1 **Hepatic NF- $\kappa$ B-inducing Kinase (NIK) Suppresses Liver Regeneration in Chronic Liver**  
2 **Disease**

3 Yi Xiong<sup>1§</sup>, Adriana Souza Torsoni<sup>1,2§</sup>, Feihua Wu<sup>1,3</sup>, Hong Shen<sup>1</sup>, Yan Liu<sup>1</sup>, Mark J Canet<sup>1</sup>,  
4 Yatrik M. Shah<sup>1</sup>, M. Bishr Omary<sup>1</sup>, Yong Liu<sup>4</sup>, Liangyou Rui<sup>1,5\*</sup>

5 <sup>1</sup>Department of Molecular & Integrative Physiology, <sup>5</sup>Department of Internal Medicine,  
6 University of Michigan Medical School, Ann Arbor, MI 48109, USA

7 <sup>2</sup>Laboratory of Metabolic Disorders, School of Applied Sciences, University of Campinas,  
8 Limeira, São Paulo, Brazil

9 <sup>3</sup>Department of Pharmacology of Chinese Materia Medica, School of Traditional Chinese  
10 Medicine, China Pharmaceutical University, Nanjing 211198, China

11 <sup>4</sup>College of Life Sciences, the Institute for Advanced Studies, Wuhan University, Wuhan  
12 430072, China

13 **Keywords:** Liver regeneration, hepatocyte proliferation, chronic liver disease, NF- $\kappa$ B-inducing  
14 Kinase, IKK $\alpha$ , JAK2, STAT3, interleukin 6

15 **Abbreviations:** PHx: hepatectomy; HFD: high fat diet; NIK: NF- $\kappa$ B-inducing Kinase; JAK2:  
16 Janus kinase 2; STAT3: Signal transducer and activator of transcription 3; AAF: 2-  
17 acetylaminofluorence.

18 **Disclosure statement:** All authors have nothing to declare.

19 **\*Lead Contact and corresponding author:**

20 Liangyou Rui, Ph.D., Department of Molecular & Integrative Physiology, University of  
21 Michigan Medical School, Ann Arbor, MI 48109, USA. E-mail: [ruiy@umich.edu](mailto:ruiy@umich.edu).

22 **Footnotes:** §co-first authors: Yi Xiong and Adriana Souza Torsoni.

23  
24  
25  
26  
27  
28  
29  
30  
31  
32  
33  
34  
35  
36

## Summary

Hepatocyte replication maintains liver homeostasis and integrity. It is impaired in chronic liver disease, promoting disease progression. Herein, we have identified NF- $\kappa$ B-inducing kinase (NIK) as an unrecognized suppressor of hepatocyte replication. Hepatic NIK was aberrantly activated in chronic liver disease. Hepatocyte-specific deletion of *NIK* or its downstream mediator *IKK $\alpha$*  substantially accelerated hepatocyte proliferation and liver regeneration following partial hepatectomy. Mechanistically, NIK and *IKK $\alpha$*  suppressed the mitogenic JAK2/STAT3 pathway, thereby inhibiting hepatocyte cell cycle progression. Remarkably, inactivation of hepatic NIK largely reversed suppression of the hepatic JAK2/STAT3 pathway, hepatocyte replication, and liver regeneration induced by either chronic liver injury or metabolic stress. Our data suggest that hepatic NIK acts as a rheostat for liver regeneration to restrain liver overgrowth. Pathologic activation of hepatic NIK blocks hepatocyte replication, likely contributing to liver disease progression.

37

## Introduction

38           The liver is an essential metabolic organ, and often experiences metabolic stress during  
39 fasting and feeding and in overnutrition states (Rui, 2014). It is also frequently exposed to  
40 harmful insults, because it detoxifies endogenous and exogenous hepatotoxic substances. Dietary  
41 hepatotoxins and gut microbiota-derived toxic substances are transported directly to the liver  
42 through enterohepatic circulation, further increasing risk for liver injury. To compensate for a  
43 loss of hepatocytes, the liver has a powerful regenerative capability to maintain its homeostasis  
44 and integrity (Michalopoulos, 2017). After 70% of partial hepatectomy (PHx), rodents are able to  
45 regain their normal liver mass within one week (Miyaoaka et al., 2012). Notably, it is equally  
46 important to avoid generation of aberrant liver cells from damaged hepatocytes in order to  
47 maintain liver integrity. Thus, a quality control mechanism likely exists to block injured  
48 hepatocytes from proliferating. We speculate that hepatocellular stress and/or injury signals  
49 activate hepatocyte-intrinsic sensors that in turn block proliferation of damaged hepatocytes  
50 through this putative quality control system.

51           Reparative hepatocyte proliferation is severely impaired in chronic liver disease,  
52 including nonalcoholic fatty liver disease (NAFLD), alcoholic liver disease, and a chronic  
53 exposure to hepatotoxins (Inaba et al., 2015; Michalopoulos, 2013; Richardson et al., 2007;  
54 Sancho-Bru et al., 2012). Hepatocyte proliferative arrest is associated with liver inflammation,  
55 injury, and fibrosis in patients with steatohepatitis (NASH) (Richardson et al., 2007), suggesting  
56 that impaired hepatocyte replication exacerbates disease progression. Numerous factors have  
57 been identified to promote hepatocyte proliferation, including various cytokines, growth factors,  
58 and the JAK2/STAT3, MAPK, PI 3-kinase, and NF- $\kappa$ B pathways (Michalopoulos, 2017).  
59 Paradoxically, most of these positive regulators are elevated in chronic liver disease. We reason

60 that liver regeneration is also governed by negative regulators that function as a molecular  
61 rheostat to restrain liver overgrowth by counterbalancing positive regulators. Some of these  
62 negative regulators likely have dual functions and are involved in the quality control of liver  
63 regeneration by blocking proliferation of damaged hepatocytes. We postulate that in chronic  
64 liver disease, such negative regulators are overactivated by hepatocellular stress/injury, leading  
65 to pathological suppression of hepatocyte proliferation/liver regeneration. However, negative  
66 regulators for hepatocyte replication, in contrast to extensively studied positive regulators, are  
67 poorly understood.

68 In search for such negative regulators that couple hepatic injury to hepatocyte replication,  
69 we identified NF- $\kappa$ B-inducing kinase (NIK). NIK is a Ser/Thr kinase known to activate the  
70 noncanonical NF- $\kappa$ B2 pathway (Sun, 2012). It phosphorylates and activates IKK $\alpha$  (Xiao et al.,  
71 2001). IKK $\alpha$  phosphorylates NF- $\kappa$ B2 precursor p100, resulting in generation of a mature NF-  
72  $\kappa$ B2 p52 form (Sun, 2012; Xiao et al., 2001). We reported that metabolic stress, oxidative stress,  
73 hepatotoxins, and many cytokines all stimulate hepatic NIK (Jiang et al., 2015; Sheng et al.,  
74 2012). Consistently, hepatic NIK is aberrantly activated in both mice and humans with NAFLD,  
75 alcoholic liver disease, or other types of chronic liver disease (Shen et al., 2014). Therefore, NIK  
76 is involved in sensing of hepatocellular stress and damage, likely functioning as a hepatocyte-  
77 intrinsic sensor for stress/injury. In this work, we characterized hepatocyte-specific *NIK*  
78 (*NIK<sup>Δhep</sup>*) and *IKK $\alpha$*  (*IKK $\alpha$ <sup>Δhep</sup>*) knockout mice, and examined reparative hepatocyte replication  
79 using a PHx model. We found that the hepatic NIK/IKK $\alpha$  pathway suppresses reparative  
80 hepatocyte proliferation and liver regeneration by inhibiting the JAK2/STAT3 pathway.  
81 Aberrantly activated hepatic NIK in chronic liver disease is responsible for, in part, impairment

82 in liver regeneration. Our data suggest that NIK is an unrecognized hepatocyte-intrinsic sensor  
83 for stress/injury and negative regulator of hepatocyte proliferation.

## 84 Results

85 **Hepatocyte-specific deletion of *NIK* accelerates liver regeneration in mice.** To assess  
86 the role of hepatic NIK in hepatocyte reparative proliferation, we performed 70% of PHx on  
87 hepatocyte-specific *NIK* knockout mice at age of 8 weeks (Mitchell and Willenbring, 2008).  
88 *NIK<sup>Δhep</sup>* mice were generated by crossing *NIK<sup>fllox/fllox</sup>* mice with *albumin-Cre* drivers as described  
89 previously (Shen et al., 2017). Proliferating cells were detected by immunostaining liver sections  
90 with antibody against Ki67, a marker of proliferating cells (Fig. 1A). Liver proliferating rates  
91 were low (<1%) under basal conditions and comparable between *NIK<sup>Δhep</sup>* and *NIK<sup>fllox/fllox</sup>* mice  
92 (Fig. 1B). PHx markedly increased the number of Ki67<sup>+</sup> proliferating cells in both groups 48 h  
93 after PHx; remarkably, liver proliferating cells were 85% higher in *NIK<sup>Δhep</sup>* mice relative to  
94 *NIK<sup>fllox/fllox</sup>* mice (Fig. 1B). In line with these findings, the number of liver BrdU<sup>+</sup> proliferating  
95 cell, as assessed by BrdU assays, was also much higher in *NIK<sup>Δhep</sup>* than in *NIK<sup>fllox/fllox</sup>* mice (Fig.  
96 1C). Liver cell proliferation declined 48 h after PHx in both *NIK<sup>Δhep</sup>* and *NIK<sup>fllox/fllox</sup>* mice, and  
97 became comparable between these two groups within 96 h after PHx (Fig. 1B).

98 To confirm that the proliferating cells are hepatocytes, we costained liver sections with  
99 antibodies against either Ki67 and HNF4α (a hepatocyte marker) or Ki67 and F4/80 (a Kupffer  
100 cell/macrophage marker). HNF4α<sup>+</sup> hepatocytes accounted for 96% of liver Ki67<sup>+</sup> proliferating  
101 cells in *NIK<sup>Δhep</sup>* mice 48 h after PHx (Figs. 1D and 1F), whereas F4/80<sup>+</sup> Kupffer  
102 cells/macrophages accounted for <4% of Ki67<sup>+</sup> cells (Fig. 1E-F). Together, these data indicate  
103 that NIK is an intrinsic suppressor of hepatocyte proliferation.

104 Next, we examined the effect of NIK deficiency on hepatocyte death. The number of  
105 liver TUNEL<sup>+</sup> apoptotic cells, as assessed by TUNEL assays, was slightly lower in *NIK<sup>Δhep</sup>* than  
106 in *NIK<sup>flox/flox</sup>* mice, but the difference was not statistically significant (Fig. 1G). Plasma alanine  
107 aminotransferase (ALT) activity, a liver injury index, was comparable between *NIK<sup>Δhep</sup>* and  
108 *NIK<sup>flox/flox</sup>* mice under both basal and PHx conditions (Fig. 1H). Thus, it is unlikely that hepatic  
109 NIK regulates hepatocyte death under these conditions.

110 To further validate the role of hepatic NIK in the maintenance of liver homeostasis, we  
111 quantified liver regeneration rates within 48 h after PHx. In line with increased hepatocyte  
112 proliferation, liver growth rates were also significantly increased in *NIK<sup>Δhep</sup>* mice compared with  
113 *NIK<sup>flox/flox</sup>* mice (Fig. 1I). In light of these findings, we propose that NIK is a hepatocyte-intrinsic  
114 rheostat for reparative proliferation that is involved in the maintenance of liver homeostasis and  
115 integrity. Moreover, damage-induced NIK activation likely provides a quality control mechanism  
116 to prevent generation of aberrant cells from damaged hepatocytes.

117 **The NF-κB1, MAPK, and PI 3-kinase pathways do not mediate NIK suppression of**  
118 **hepatocyte reparative proliferation.** To further confirm NIK inhibition of hepatic cell cycle  
119 progression, we measured the levels of hepatic cyclin D1, which is believed to drive hepatocyte  
120 proliferation after PHx (Michalopoulos, 2013). Hepatic cyclin D1 was undetectable under basal  
121 conditions in both *NIK<sup>Δhep</sup>* and *NIK<sup>flox/flox</sup>* mice, and markedly increased after PHx in both groups  
122 (Fig. 2A). In line with increased hepatocyte proliferation, hepatic cyclin D1 levels were  
123 significantly higher in *NIK<sup>Δhep</sup>* than in *NIK<sup>flox/flox</sup>* mice (Fig. 2A-B).

124 We next sought to study the molecular mechanism of NIK action. NF-κB1, MAPK, and  
125 PI 3-kinase pathways are known to be involved in mediating PHx-stimulated liver regeneration  
126 (Michalopoulos, 2013; Pauta et al., 2016; Wuestefeld et al., 2013). Surprisingly, phosphorylation

127 of hepatic IKK $\alpha/\beta$ , I $\kappa$ B $\alpha$ , p65 (the NF- $\kappa$ B1 pathway), Akt (pSer473) (the PI 3-kinase pathway),  
128 ERK1/2, and JNK (the MAPK pathway) was comparable between *NIK<sup>Δhep</sup>* and *NIK<sup>flox/flox</sup>* mice 4  
129 h after PHx (Fig. 2C). We also assessed liver reactive oxygen species (ROS) and expression of  
130 various cytokines, and did not detect difference between *NIK<sup>Δhep</sup>* and *NIK<sup>flox/flox</sup>* mice (Fig. 2D-E).  
131 Therefore, these pathways are unlikely to mediate suppression of liver regeneration by hepatic  
132 NIK.

133 **NIK directly suppresses the Janus kinase 2 (JAK2)/STAT3 pathway.** JAK2  
134 phosphorylates and activates STAT3, and the JAK2/STAT3 pathway is believed to drive  
135 hepatocyte proliferation (Shi et al., 2017; Wang et al., 2011). We postulated that NIK might  
136 suppresses hepatocyte proliferation by inhibiting the JAK2/STAT3 pathway. Liver extracts were  
137 prepared 4 h after PHx and immunoblotted with anti-phospho-JAK2 (pTyr1007/1008) or anti-  
138 phospho-STAT3 (pTyr705) antibodies. Phosphorylation of both JAK2 and STAT3 was  
139 significantly higher in *NIK<sup>Δhep</sup>* than in *NIK<sup>flox/flox</sup>* littermates (Fig. 3A).

140 To confirm that NIK directly inhibits the JAK2/STAT3 pathway, we transiently  
141 coexpressed JAK2 and STAT3 with NIK in HEK293 cells. JAK2 was autophosphorylated and  
142 robustly phosphorylated STAT3 in the absence of NIK (Fig. 3B), as we previously reported (Rui  
143 and Carter-Su, 1999). Overexpression of NIK dramatically attenuated phosphorylation of both  
144 JAK2 and STAT3 (Fig. 3B). Moreover, NIK was coimmunoprecipitated with JAK2 (Fig. 3C).  
145 These data indicate that NIK binds to JAK2 and inhibits JAK2 activity, thereby suppressing the  
146 JAK2/STAT3 pathway.

147 We next tested if NIK negatively regulates interleukin 6 (IL6)-stimulated activation of  
148 the JAK2/STAT3 pathway, because the IL6/JAK2/STAT3 cascade is required for hepatocyte  
149 reparative proliferation (Cressman et al., 1996; Riehle et al., 2008). Mouse primary hepatocytes

150 were transduced with NIK or  $\beta$ -galactosidase ( $\beta$ -gal; control) adenoviral vectors, and then  
151 stimulated with IL6. IL6 rapidly and robustly stimulated phosphorylation of STAT3 in  $\beta$ -gal-  
152 transduced hepatocytes; strikingly, overexpression of NIK completely blocked IL6-stimulated  
153 phosphorylation of STAT3 (Fig. 3D). We did not detect endogenous JAK2, because its levels  
154 were below the detection threshold of our assays. Overall, our data unveiled unrecognized  
155 crosstalk between NIK and JAK2/STAT3 pathways. NIK inhibits hepatocyte proliferation at  
156 least in part by restraining the JAK2/STAT3 pathway.

157 **Hepatic IKK $\alpha$  suppresses liver regeneration after PHx.** NIK phosphorylates and  
158 activates IKK $\alpha$  (Sun, 2012), prompting us to test if hepatocyte-specific *IKK $\alpha$*  knockout mice, like  
159 *NIK $\Delta$ <sup>hep</sup>* mice, also display accelerated liver regeneration. *IKK $\alpha$ <sup>Δhep</sup>* mice were generated by  
160 crossing *IKK $\alpha$ <sup>flox/flox</sup>* mice with *albumin-Cre* drivers (Liu et al., 2008). *IKK $\alpha$*  was disrupted  
161 specifically in the liver, but not the brain, heart, kidney, skeletal muscle, and spleen, of *IKK $\alpha$ <sup>Δhep</sup>*  
162 mice (Fig. 4A). We performed PHx on *IKK $\alpha$ <sup>flox/flox</sup>* and *IKK $\alpha$ <sup>Δhep</sup>* male mice at 8-9 weeks of age.  
163 The number of liver Ki67<sup>+</sup> proliferating cell was significantly higher in *IKK $\alpha$ <sup>Δhep</sup>* than in  
164 *IKK $\alpha$ <sup>flox/flox</sup>* littermates 48 h after PHx (Fig. 4B). The proliferating cells were HNF4 $\alpha$ <sup>+</sup>  
165 hepatocytes (Fig. 4C). Consistently, liver cyclin D1 levels were significantly higher in *IKK $\alpha$ <sup>Δhep</sup>*  
166 than in *IKK $\alpha$ <sup>flox/flox</sup>* mice (Fig. 4D). In contrast, liver cell death was comparable between *IKK $\alpha$ <sup>Δhep</sup>*  
167 and *IKK $\alpha$ <sup>flox/flox</sup>* littermates (Fig. 4E). Consequently, liver regeneration rates were significantly  
168 higher in *IKK $\alpha$ <sup>Δhep</sup>* mice relative to *IKK $\alpha$ <sup>flox/flox</sup>* mice (Fig. 4F). These results suggest that IKK $\alpha$   
169 acts downstream of NIK to suppress liver regeneration.

170 We next sought to test if IKK $\alpha$ , like NIK, inhibits the JAK2/STAT3 pathway.  
171 Phosphorylation of both JAK2 and STAT3 was significantly higher in *IKK $\alpha$ <sup>Δhep</sup>* than in  
172 *IKK $\alpha$ <sup>flox/flox</sup>* mice 4 h after PHx (Fig. 5A-B). To determine whether IKK $\alpha$  directly inhibits JAK2,



173 IKK $\alpha$  was transiently coexpressed with JAK2 in HEK293 cells. IKK $\alpha$  markedly decreased JAK2  
174 autophosphorylation and the ability of JAK2 to phosphorylate STAT3 (Fig. 5C). Furthermore,  
175 IKK $\alpha$  was coimmunoprecipitated with JAK2 (Fig. 5D). Thus, NIK is able to inhibit the  
176 JAK2/STAT3 pathway both directly and indirectly through activating IKK $\alpha$ .

177 **Deletion of hepatic *NIK* reverses hepatotoxin-induced suppression of liver**  
178 **regeneration.** Since hepatic NIK is aberrantly activated in chronic liver disease (Shen et al.,  
179 2014; Sheng et al., 2012), we speculated that it might be a causal factor for impaired liver  
180 regeneration that promotes disease progression. To model chronic liver disease, mice were  
181 treated with 2-acetylaminofluorene (AAF), a hepatotoxin (Laishes and Rolfe, 1981). AAF  
182 treatment considerably activated hepatic NIK, as assessed by upregulation of NF-kB2 p52 (Fig.  
183 6A). To examine the impact of elevated NIK on liver regeneration, *NIK* <sup>$\Delta$ hep</sup> and *NIK*<sup>flox/flox</sup> mice  
184 were pretreated with AAF for 10 days prior to PHx. Proliferating cells were assessed 48 h after  
185 PHx by immunostaining liver sections with anti-Ki67 antibody (Fig. 6B). Baseline hepatocyte  
186 proliferation was low and similar between *NIK*<sup>flox/flox</sup> and *NIK* <sup>$\Delta$ hep</sup> mice prior to PHx (Fig. 6C).  
187 PHx markedly increased hepatocyte proliferation in PBS-treated *NIK*<sup>flox/flox</sup> mice (control) as  
188 expected, and AAF pretreatment substantially decreased hepatocyte proliferation by >50% (Fig.  
189 6D). Remarkably, deletion of hepatic *NIK* largely reversed AAF-induced suppression of  
190 hepatocyte proliferation in *NIK* <sup>$\Delta$ hep</sup> mice (Fig. 6D). In contrast, plasma ALT levels (a liver injury  
191 index) was similar between *NIK*<sup>flox/flox</sup> and *NIK* <sup>$\Delta$ hep</sup> mice (Fig. 6E). In line with increased  
192 hepatocyte proliferation, liver regeneration rates after PHx were also significantly higher in  
193 AAF-pretreated *NIK* <sup>$\Delta$ hep</sup> mice relative to *NIK*<sup>flox/flox</sup> littermates (Fig. 6F).

194 We next examined cell signaling events that drive cell cycle progression. We detected  
195 baseline phosphorylation of hepatic STAT3 in AAF-pretreated *NIK* <sup>$\Delta$ hep</sup> but not *NIK*<sup>flox/flox</sup> mice

196 prior to PHx (Fig. 6G). PHx stimulated phosphorylation of hepatic STAT3 in both *NIK<sup>Δhep</sup>* and  
197 *NIK<sup>flox/flox</sup>* mice; however, STAT3 phosphorylation was substantially higher in *NIK<sup>Δhep</sup>* mice (Fig.  
198 6G). Baseline hepatic cyclin D was undetectable in both AAF-pretreated *NIK<sup>Δhep</sup>* and *NIK<sup>flox/flox</sup>*  
199 mice prior to PHx. PHx upregulated hepatic cyclin D1 to a higher level in *NIK<sup>Δhep</sup>* mice relative  
200 to *NIK<sup>flox/flox</sup>* littermates (Fig. 6G). Together, these data further support the notion that NIK serves  
201 as a hepatocyte-intrinsic rheostat to restrain liver regeneration through inhibiting the  
202 JAK2/STAT3 pathway. Importantly, abnormal activation of hepatic NIK is likely responsible for  
203 impaired liver regeneration in chronic liver disease, contributing to disease progression.

204 **Deletion of hepatic NIK reverses NAFLD-associated suppression of liver**  
205 **regeneration.** To model NAFLD, *NIK<sup>Δhep</sup>* and *NIK<sup>flox/flox</sup>* mice were fed a high fat diet (HFD) for  
206 10 weeks. HFD-fed *NIK<sup>Δhep</sup>* and *NIK<sup>flox/flox</sup>* mice developed liver steatosis, as assessed by liver  
207 triacylglycerol (TAG) levels, to a similar degree (Fig. 7A). HFD feeding was reported to increase  
208 hepatic NIK activity (Sheng et al., 2012). Consistently, NF-κB2 p52 levels was higher in HFD-  
209 fed than normal chow-fed mice (Fig. 7B).

210 NAFLD/NASH is associated with impaired liver regeneration (Collin de l'Hortet et al.,  
211 2014; Inaba et al., 2015). We hypothesized that elevated hepatic NIK is responsible for  
212 suppression of liver generation in NAFLD/NASH. *NIK<sup>Δhep</sup>* and *NIK<sup>flox/flox</sup>* mice were fed a HFD  
213 for 10 weeks followed by PHx. Hepatocyte proliferation was assessed 48 h post-PHx by staining  
214 liver sections with anti-Ki67 antibody (Fig. 7C). Baseline hepatocyte proliferation was similarly  
215 low in both *NIK<sup>Δhep</sup>* and *NIK<sup>flox/flox</sup>* mice prior to PHx (Fig. 7D). PHx markedly induced  
216 hepatocyte proliferation in chow-fed *NIK<sup>flox/flox</sup>* mice, and HFD feeding substantially decreased  
217 Ki67<sup>+</sup> proliferating hepatocyte number as expected (Fig. 7E). Remarkably, hepatocyte-specific  
218 deletion of *NIK* dramatically increased Ki67<sup>+</sup> liver cell number in *NIK<sup>Δhep</sup>* mice close to normal

219 levels (Fig. 7E). Consistently, liver growth rates was higher in *NIK<sup>Δhep</sup>* mice relative to *NIK<sup>flox/flox</sup>*  
220 mice, albeit those differences were not statistically significant (Fig. 7F). It is worth mentioning  
221 that high levels of liver TAG in HFD-fed mice might mask our assessments of liver growth rates  
222 that were based on liver weight changes. Plasma ALT levels were comparable between *NIK<sup>Δhep</sup>*  
223 and *NIK<sup>flox/flox</sup>* littermates under both basal and PHx conditions (Fig. 7G), suggesting that hepatic  
224 NIK does not directly affect liver injury under these conditions.

225 We further explored mitogenic pathways in the livers of these mice. STAT3  
226 phosphorylation was similar between HFD-fed *NIK<sup>Δhep</sup>* and *NIK<sup>flox/flox</sup>* mice under baseline  
227 conditions, and increased to a considerably higher level in *NIK<sup>Δhep</sup>* mice relative to *NIK<sup>flox/flox</sup>*  
228 mice 48 h post-PHx (Fig. 7H). Hepatic cyclin D1 levels were also higher in *NIK<sup>Δhep</sup>* mice relative  
229 to *NIK<sup>flox/flox</sup>* mice after PHx (Fig. 7H). Overall, these data suggest that aberrant activation of  
230 hepatic NIK in NAFLD/NASH suppresses hepatocyte reparative proliferation through inhibiting  
231 the JAK2/STAT3 pathway.

## 232 Discussion

233 Reparative hepatocyte proliferation supplies new hepatocytes to replace lost and damaged  
234 hepatocytes, thereby maintaining liver homeostasis and integrity. The quality control mechanism  
235 of liver regeneration likely blocks proliferation of damaged hepatocytes, preventing generation  
236 of dysfunctional or aberrant cells from the impaired hepatocytes. In this work, we have identified  
237 NIK as a hepatocyte-intrinsic sensor for liver stress and injury that controls the quality control  
238 machinery. Supporting this notion, we found that metabolic stress and numerous hepatotoxic  
239 stimuli potently activate hepatic NIK (Sheng et al., 2012). Hepatocyte-specific deletion of *NIK*,  
240 which is expected allow damaged hepatocytes to regain their proliferating capability due to

241 disruption of their quality control mechanism, substantially increases hepatocyte proliferation  
242 and accelerates liver regeneration in *NIK<sup>Ahep</sup>* mice following PHx.

243         We have gained important insight into the potential molecular mechanism by which NIK  
244 suppresses hepatocyte proliferation and liver regeneration. NIK is known to activate IKK $\alpha$  (Sun,  
245 2012). We found that mice with hepatocyte-specific deletion of *IKK $\alpha$*  phenocopy *NIK<sup>Ahep</sup>* mice  
246 with regard to reparative hepatocyte proliferation and liver regeneration following PHx. It is well  
247 established that activation of the JAK2/STAT3 drives hepatocyte proliferation and liver  
248 regeneration (Cressman et al., 1996; Riehle et al., 2008; Shi et al., 2017; Wang et al., 2011).  
249 Remarkably, we observed that IKK $\alpha$  binds to JAK2 and inhibits the ability of JAK2 to  
250 phosphorylate STAT3 in cell cultures. In line with these findings, phosphorylation of  
251 endogenous hepatic JAK2 and STAT3 is markedly elevated in both *IKK $\alpha$ <sup>Ahep</sup>* and *NIK<sup>Ahep</sup>* mice  
252 following PHx. These results unveil novel crosstalk between the NIK/IKK $\alpha$  pathway and the  
253 JAK2/STAT3 pathway. In light of these findings, we propose that the NIK/IKK $\alpha$  cascade, which  
254 is activated in damaged hepatocytes, functions as a brake to block proliferation of damaged  
255 hepatocytes through, in part, inhibiting the JAK2/STAT3 pathway. Notably, we found that NIK  
256 also directly binds to JAK2 and inhibits JAK2 activity (i.e. its autophosphorylation and ability to  
257 phosphorylate STAT3) in cell cultures. Therefore, NIK is able to suppress the JAK2/STAT3  
258 pathway both directly and indirectly via IKK $\alpha$ . Additional studies are warranted to determine the  
259 relative contributions of the IKK $\alpha$ -dependent and the IKK $\alpha$ -independent mechanisms to  
260 suppression of liver regeneration by NIK.

261         We have provided proof of concept evidence showing that abnormally-activated hepatic  
262 NIK is responsible for suppression of liver regeneration in chronic liver disease. Chronic liver  
263 disease was modeled using two distinct approaches: chronic treatment with either hepatotoxin

264 AAF or a HFD. In these contexts, we postulate that hepatic NIK serves as a rheostat for liver  
265 regeneration to counterbalance overgrowth of the liver. Thus, aberrant activation of hepatic NIK  
266 is expected to impair reparative hepatocyte proliferation, contributing to liver disease  
267 progression. Supporting this notion, we found that hepatocyte-specific inactivation of NIK  
268 substantially increases hepatocyte proliferation in both AAF-treated or HFD-fed  $NIK^{\Delta hep}$  mice  
269 following PHx. Consistently, both phosphorylation of hepatic JAK2 and STAT3 and expression  
270 of hepatic cyclin D1 are markedly elevated in  $NIK^{\Delta hep}$  mice. These findings raise an intriguing  
271 possibility that pharmacological inhibition of hepatic NIK may provide a novel therapeutic  
272 strategy to treat chronic liver disease.

273 In conclusion, we have identified hepatic NIK as an unrecognized hepatocyte-intrinsic  
274 sensor for hepatic stress/injury that suppresses liver regeneration through, in part, inhibiting the  
275 JAK2/STAT3 pathway. In chronic liver disease, aberrantly-activated hepatic NIK impairs liver  
276 regeneration, contributing to liver disease progression.

## 277 Experimental Procedures

278 **Animals.** Animal experiments were conducted following the protocols approved by the  
279 University of Michigan Institutional Animal Care and Use Committee (IACUC). Mice were  
280 housed on a 12-h light-dark cycle and fed a normal chow diet (9% fat; Lab Diet, St. Louis, MO)  
281 or a HFD (60% fat in calories; D12492, Research Diets, New Brunswick, NJ) *ad libitum* with  
282 free access to water.

283 **PHx models.** We followed published 2/3 PHx protocols (Mitchell and Willenbring, 2008).  
284 Briefly,  $NIK^{flox/flox}$ ,  $NIK^{\Delta hep}$ ,  $IKK\alpha^{flox/flox}$ , and  $IKK\alpha^{\Delta hep}$  male mice (8 wks, C57BL/6 background)  
285 were anesthetized with isoflurane, followed by a ventral midline incision. The median and left

286 lateral lobes (70% of the liver) were resected by pedicle ligations. Mice were euthanized 24, 48,  
287 or 96 h after PHx, and tissues were harvested for histological and biochemical analyses. Mice  
288 were intraperitoneally injected, 12 h before euthanization, with BrdU (40 mg/kg body weight, ip)  
289 to label proliferating cells. A separate cohort was fed a HFD for 10 weeks prior to PHx. An  
290 additional cohort was treated with hepatotoxin 2-acetylaminofluorene (AAF) (10 mg/kg body  
291 weight, gavage) daily for 10 days prior to PHx.

292 Estimation of total liver weight before PHx: resected liver weight  $\div$  70%. Calculation of  
293 the remnant liver weight after PHx: total liver weight - resected liver weight. Liver weight gains:  
294 terminal liver weight - the remnant liver weight. Liver growth rates: liver weight gains  
295 normalized to the remnant liver weight after PHx.

296 **Immunostaining.** Liver frozen sections were prepared using a Leica cryostat (Leica Biosystems  
297 Nussloch GmbH, Nussloch, Germany), fixed in 4% paraformaldehyde for 30 min, blocked for 3  
298 h with 5% normal goat serum (Life Technologies) supplemented with 1% BSA, and incubated  
299 with the indicated antibodies at 4<sup>0</sup>C overnight. The sections were incubated with Cy2 or Cy3-  
300 conjugated secondary antibodies.

301 **Cell cultures, transient transfection, and adenoviral transductions.** Primary hepatocytes were  
302 prepared from mouse liver using type II collagenase (Worthington Biochem, Lakewood, NJ)  
303 and grown on William's medium E (Sigma) supplemented with 2% FBS, 100 units  
304 ml<sup>-1</sup> penicillin, and 100  $\mu$ g ml<sup>-1</sup> streptomycin, and infected with adenoviruses as described  
305 previously (Zhou et al., 2009). HEK293 cells were grown at 37°C in 5% CO<sub>2</sub> in DMEM  
306 supplemented with 25 mM glucose, 100 U ml<sup>-1</sup> penicillin, 100  $\mu$ g ml<sup>-1</sup> streptomycin, and 8% calf  
307 serum. For transient transfection, cells were split 16-20 h before transfection. Expression  
308 plasmids were mixed with polyethylenimine (Sigma, St. Louis, MO) and introduced into cells.

309 The total amount of plasmids was maintained constant by adding empty vectors. Cells were  
310 harvested 48 h after transfection for biochemical analyses.

311 ***Immunoprecipitation and immunoblotting.*** Cells or tissues were homogenized in a L-RIPA  
312 lysis buffer (50 mM Tris, pH 7.5, 1% Nonidet P-40, 150 mM NaCl, 2 mM EGTA, 1 mM  
313 Na<sub>3</sub>VO<sub>4</sub>, 100 mM NaF, 10 mM Na<sub>4</sub>P<sub>2</sub>O<sub>7</sub>, 1 mM benzamidine, 10 µg ml<sup>-1</sup> aprotinin, 10 µg ml<sup>-1</sup>  
314 leupeptin, 1 mM phenylmethylsulfonyl fluoride). Tissue samples were homogenized in lysis  
315 buffer (50 mM Tris, pH 7.5, 1% Nonidet P-40, 150 mM NaCl, 2 mM EGTA, 1 mM Na<sub>3</sub>VO<sub>4</sub>,  
316 100 mM NaF, 10 mM Na<sub>4</sub>P<sub>2</sub>O<sub>7</sub>, 1 mM benzamidine, 10 µg/ml aprotinin, 10 µg/ml leupeptin; 1  
317 mM phenylmethylsulfonyl fluoride). Proteins were separated by SDS-PAGE and immunoblotted  
318 with the indicated antibodies.

319 ***Real-time quantitative PCR (qPCR) and ROS assays.*** Total RNAs were extracted using TRIzol  
320 reagents (Life technologies). Relative mRNA abundance of different genes was measured using  
321 SYBR Green PCR Master Mix (Life Technologies, 4367659). Liver lysates were mixed with a  
322 dichlorofluorescein diacetate fluorescent (DCF, Sigma, D6883) probe (5 µM) for 1 h at 37°C.  
323 DCF fluorescence was measured using a BioTek Synergy 2 Multi-Mode Microplate Reader (485  
324 nm excitation and 527 nm emission).

325 ***Statistical Analysis.*** Data were presented as means ± sem. Differences between two groups was  
326 analyzed using two-tailed Student's t tests. P < 0.05 was considered statistically significant.

### 327 **Author Contributions**

328 YX, AST, LR: Study concept and design; YX, AST, FW, HS, YL, MJC: acquisition of data; YX,  
329 AST, LR: drafting of the manuscript; YS, BMO, LY: critical revision of the manuscript for  
330 important intellectual content.

331

## Acknowledgements

332 We thank Drs. Lin Jiang, Liang Sheng, Chengxin Sun, and Lei Yin and Michelle Jin for  
333 assistance and discussion. This study was supported by grants DK091591, DK114220 (LR) and  
334 DK47918 (MBO) from the National Institutes of Health (NIH), fellowship #2013/07313-4 from  
335 São Paulo Research Foundation (FAPESP) (AST), and grant 81420108006 (YL) from National  
336 Natural Science Foundation of China. This work utilized the cores supported by the Michigan  
337 Diabetes Research and Training Center (NIH DK20572), the University of Michigan's Cancer  
338 Center (NIH CA46592), the University of Michigan Nathan Shock Center (NIH P30AG013283),  
339 and the University of Michigan Gut Peptide Research Center (NIH DK34933).

340

341

## References

342

343 Collin de l'Hortet, A., Zerrad-Saadi, A., Prip-Buus, C., Fauveau, V., Helmy, N., Zioli, M., Vons, C., Billot, K.,  
344 Baud, V., Gilgenkrantz, H., et al. (2014). GH Administration Rescues Fatty Liver Regeneration Impairment  
345 by Restoring GH/EGFR Pathway Deficiency. *Endocrinology* 155, 2545-2554.

346 Cressman, D.E., Greenbaum, L.E., DeAngelis, R.A., Ciliberto, G., Furth, E.E., Poli, V., and Taub, R. (1996).  
347 Liver failure and defective hepatocyte regeneration in interleukin-6-deficient mice. *Science* 274, 1379-  
348 1383.

349 Inaba, Y., Furutani, T., Kimura, K., Watanabe, H., Haga, S., Kido, Y., Matsumoto, M., Yamamoto, Y.,  
350 Harada, K., Kaneko, S., et al. (2015). Growth arrest and DNA damage-inducible 34 regulates liver  
351 regeneration in hepatic steatosis in mice. *Hepatology* 61, 1343-1356.



352 Jiang, B., Shen, H., Chen, Z., Yin, L., Zan, L., and Rui, L. (2015). Carboxyl Terminus of HSC70-interacting  
353 Protein (CHIP) Down-regulates NF-kappaB-inducing Kinase (NIK) and Suppresses NIK-induced Liver  
354 Injury. *The Journal of biological chemistry* 290, 11704-11714.

355 Laishes, B.A., and Rolfe, P.B. (1981). Search for endogenous liver colony-forming units in F344 rats given  
356 a two-thirds hepatectomy during short-term feeding of 2-acetylaminofluorene. *Cancer Res* 41, 1731-  
357 1741.

358 Liu, B., Xia, X., Zhu, F., Park, E., Carbajal, S., Kiguchi, K., DiGiovanni, J., Fischer, S.M., and Hu, Y. (2008).  
359 IKKalpha is required to maintain skin homeostasis and prevent skin cancer. *Cancer Cell* 14, 212-225.

360 Michalopoulos, G.K. (2013). Principles of liver regeneration and growth homeostasis. *Compr Physiol* 3,  
361 485-513.

362 Michalopoulos, G.K. (2017). Hepatostat: Liver regeneration and normal liver tissue maintenance.  
363 *Hepatology* 65, 1384-1392.

364 Mitchell, C., and Willenbring, H. (2008). A reproducible and well-tolerated method for 2/3 partial  
365 hepatectomy in mice. *Nat Protoc* 3, 1167-1170.

366 Miyaoka, Y., Ebato, K., Kato, H., Arakawa, S., Shimizu, S., and Miyajima, A. (2012). Hypertrophy and  
367 unconventional cell division of hepatocytes underlie liver regeneration. *Curr Biol* 22, 1166-1175.

368 Pauta, M., Rotllan, N., Fernandez-Hernando, A., Langhi, C., Ribera, J., Lu, M., Boix, L., Bruix, J., Jimenez,  
369 W., Suarez, Y., et al. (2016). Akt-mediated foxo1 inhibition is required for liver regeneration. *Hepatology*  
370 63, 1660-1674.

371 Richardson, M.M., Jonsson, J.R., Powell, E.E., Brunt, E.M., Neuschwander-Tetri, B.A., Bhathal, P.S., Dixon,  
372 J.B., Weltman, M.D., Tilg, H., Moschen, A.R., et al. (2007). Progressive fibrosis in nonalcoholic  
373 steatohepatitis: association with altered regeneration and a ductular reaction. *Gastroenterology* 133,  
374 80-90.

375 Riehle, K.J., Campbell, J.S., McMahan, R.S., Johnson, M.M., Beyer, R.P., Bammler, T.K., and Fausto, N.  
376 (2008). Regulation of liver regeneration and hepatocarcinogenesis by suppressor of cytokine signaling 3.  
377 *J Exp Med* 205, 91-103.

378 Rui, L. (2014). Energy metabolism in the liver. *Compr Physiol* 4, 177-197.

379 Rui, L., and Carter-Su, C. (1999). Identification of SH2-bbeta as a potent cytoplasmic activator of the  
380 tyrosine kinase Janus kinase 2. *Proc Natl Acad Sci U S A* 96, 7172-7177.

381 Sancho-Bru, P., Altamirano, J., Rodrigo-Torres, D., Coll, M., Millan, C., Jose Lozano, J., Miquel, R., Arroyo,  
382 V., Caballeria, J., Gines, P., et al. (2012). Liver progenitor cell markers correlate with liver damage and  
383 predict short-term mortality in patients with alcoholic hepatitis. *Hepatology* 55, 1931-1941.

384 Shen, H., Sheng, L., Chen, Z., Jiang, L., Su, H., Yin, L., Omary, M.B., and Rui, L. (2014). Mouse hepatocyte  
385 overexpression of NF-kappaB-inducing kinase (NIK) triggers fatal macrophage-dependent liver injury and  
386 fibrosis. *Hepatology* 60, 2065-2076.

387 Shen, H., Sheng, L., Xiong, Y., Kim, Y.H., Jiang, L., Chen, Z., Liu, Y., Pyaram, K., Chang, C.H., and Rui, L.  
388 (2017). Thymic NF-kappaB-inducing Kinase (NIK) Regulates CD4+ T Cell-elicited Liver Injury and Fibrosis  
389 in Mice. *J Hepatol*.

390 Sheng, L., Zhou, Y., Chen, Z., Ren, D., Cho, K.W., Jiang, L., Shen, H., Sasaki, Y., and Rui, L. (2012). NF-  
391 kappaB-inducing kinase (NIK) promotes hyperglycemia and glucose intolerance in obesity by augmenting  
392 glucagon action. *Nat Med* 18, 943-949.

393 Shi, S.Y., Schroer, S.A., Luk, C.T., Kim, M.J., Dodington, D.W., Lin, L., Sivasubramaniam, T., Cai, E.P., Lu,  
394 S.Y., Wagner, K.U., et al. (2017). Janus kinase 2 (JAK2) Dissociates Hepatosteatosis from Hepatocellular  
395 Carcinoma in Mice. *The Journal of biological chemistry*.

396 Sun, S.C. (2012). The noncanonical NF-kappaB pathway. *Immunol Rev* 246, 125-140.

397 Wang, H., Lafdil, F., Kong, X., and Gao, B. (2011). Signal transducer and activator of transcription 3 in  
398 liver diseases: a novel therapeutic target. *Int J Biol Sci* 7, 536-550.

399 Wuestefeld, T., Pesic, M., Rudalska, R., Dauch, D., Longerich, T., Kang, T.W., Yevsa, T., Heinzmann, F.,  
400 Hoenicke, L., Hohmeyer, A., et al. (2013). A Direct In Vivo RNAi Screen Identifies MKK4 as a Key  
401 Regulator of Liver Regeneration. *Cell* 153, 389-401.  
402 Xiao, G., Harhaj, E.W., and Sun, S.C. (2001). NF-kappaB-inducing kinase regulates the processing of NF-  
403 kappaB2 p100. *Mol Cell* 7, 401-409.  
404 Zhou, Y., Jiang, L., and Rui, L. (2009). Identification of MUP1 as a regulator for glucose and lipid  
405 metabolism in mice. *The Journal of biological chemistry* 284, 11152-11159.  
406  
407  
408

409

## Figure legends

410 **Figure 1. Hepatocyte-specific deletion of *NIK* accelerates hepatocyte reparative**  
411 **proliferation.** *NIK*<sup>flox/flox</sup> (n=7) and *NIK*<sup>Δhep</sup> (n=7) male mice (8 weeks) were subjected to PHx,  
412 and livers were harvested 48 h or 96 h later. (A) Representative immunostaining of liver sections  
413 (48 h after PHx) with anti-Ki67. (B) Ki67<sup>+</sup> cells were counted and normalized to total DAPI<sup>+</sup>  
414 cells. (C) Representative immunostaining of liver sections (48 h after PHx) with anti-BrdU  
415 antibodies. (D-E) Representative images of liver sections (48 h after PHx) costained with anti-  
416 Ki67 and anti-HNF4α antibodies (D) or anti-Ki67 and anti-F4/80 antibodies (E). (F)  
417 Ki67<sup>+</sup>HNF4α<sup>+</sup> and Ki67<sup>+</sup>F4/80<sup>+</sup> cells were counted and normalized to total Ki67<sup>+</sup> cells. (G)  
418 Liver cell death were assessed 48 h after PHx using TUNEL reagents. (H) Plasma ALT levels.  
419 (I) Liver growth rates within 48 h after PHx. Data were statistically analyzed with two-tailed  
420 Student's t test, and presented as mean ± SEM. \*p<0.05.

421 **Figure 2. Hepatic *NIK* deficiency upregulates cyclin D1 without altering NF-κB1, Akt, and**  
422 **MAPK pathways in the liver.** *NIK*<sup>flox/flox</sup> and *NIK*<sup>Δhep</sup> male mice (8 weeks) were subjected to  
423 PHx. (A-B) Liver extracts were immunoblotted with anti-cyclin D1 antibody (48 h after PHx).  
424 Cyclin D1 levels were quantified and normalized to α-tubulin levels (*NIK*<sup>flox/flox</sup>: n=7, *NIK*<sup>Δhep</sup>:  
425 n=7). (C) Liver extracts were immunoblotted with the indicated antibodies (4 h after PHx). (D)  
426 Liver ROS levels 48 h after PHx (normalized to liver weight). *NIK*<sup>flox/flox</sup>: n=4, *NIK*<sup>Δhep</sup>: n=4. (E)  
427 Liver cytokine expression was measured by qPCR and normalized to 36B4 expression (48 h after  
428 PHx). *NIK*<sup>flox/flox</sup>: n=5, *NIK*<sup>Δhep</sup>: n=5. Data were statistically analyzed with two-tailed  
429 Student's t test, and presented as mean ± SEM. \*p<0.05.

430 **Figure 3. *NIK* inhibits the JAK2/STAT3 pathway.** (A) Liver extracts were prepared from  
431 *NIK*<sup>flox/flox</sup> and *NIK*<sup>Δhep</sup> male 4 h after PHx and immunoblotted with anti-phospho-JAK2 and anti-

432 phospho-STAT3 antibodies. Phosphorylation of JAK2 (pTyr1007/1008) and STAT3 (pTyr705)  
433 was normalized to total JAK2 and STAT3 levels, respectively. **(B)** STAT3 and JAK2 were  
434 coexpressed with or without NIK in HEK293 cells. Cell extracts were immunoblotted with the  
435 indicated antibodies. **(C)** NIK was coexpressed with JAK2 in HEK293 cells. Cell extracts were  
436 immunoprecipitated (IP) and immunoblotted with the indicated antibodies. **(D)** Mouse primary  
437 hepatocytes were transduced with NIK or  $\beta$ -gal adenoviral vectors and stimulated with IL6 (10  
438 ng/ml). Cell extracts were immunoblotted with the indicated antibodies. Data were statistically  
439 analyzed with two-tailed Student's t test, and presented as mean  $\pm$  SEM. \* $p < 0.05$ .

440 **Figure 4. Hepatocyte-specific deletion of *IKK $\alpha$*  accelerates hepatocyte reparative**  
441 **proliferation.** **(A)** Tissue extracts were immunoblotted with anti-*IKK $\alpha$*  or anti- $\alpha$ -tubulin  
442 antibodies. **(B-F)** *IKK $\alpha$ <sup>fllox/fllox</sup>* (n=6) and *IKK $\alpha$ <sup>Ahep</sup>* (n=6) male littermates were subjected to PHx,  
443 and livers were harvested 48 h later. **(B)** Liver sections were immunostained with anti-Ki67  
444 antibody, and Ki67<sup>+</sup> cells were counted and normalized to total DAPI<sup>+</sup> cells. **(C)** Representative  
445 images of liver sections costained with anti-Ki67 and anti-HNF4 $\alpha$  antibodies. **(D)** Liver cyclin  
446 D1 was measured by immunoblotting (normalized to  $\alpha$ -tubulin levels). **(E)** TUNEL-positive cells  
447 in liver sections. **(F)** Liver growth rates within 48 h after PHx. Data were statistically analyzed  
448 with two-tailed Student's t test, and presented as mean  $\pm$  SEM. \* $p < 0.05$ .

449 **Figure 5. *IKK $\alpha$*  inhibits the JAK2/STAT3 pathway.** **(A-B)** Liver extracts were prepared 4 h  
450 after PHx and immunoblotted with anti-phospho-JAK2 and anti-phospho-STAT3 antibodies.  
451 Phosphorylation of JAK2 (pTyr1007/1008) and STAT3 (pTyr705) was normalized to total JAK2  
452 and STAT3 levels, respectively. *IKK $\alpha$ <sup>fllox/fllox</sup>*: n=5, *IKK $\alpha$ <sup>Ahep</sup>*: n=5. **(C)** STAT3 and JAK2 were  
453 coexpressed with *IKK $\alpha$*  in HEK293 cells. Cell extracts were immunoblotted with the indicated  
454 antibodies. **(D)** *IKK $\alpha$*  and JAK2 were coexpressed in HEK293 cells. Cell extracts were

455 immunoprecipitated (IP) and immunoblotted with the indicated antibodies. Data were  
456 statistically analyzed with two-tailed Student's t test, and presented as mean  $\pm$  SEM. \* $p < 0.05$ .

457 **Figure 6. Hepatocyte-specific deletion of *NIK* reverses AAF-induced impairment in**

458 **hepatocyte reparative proliferation. (A)** C57BL/6 males (8 weeks) were treated with PBS or

459 AAF (10 mg/kg body weight, gavage) daily for 10 days. NF- $\kappa$ B2 p52 in liver extracts was

460 immunoblotted with anti-NF- $\kappa$ B2 antibody (normalized to  $\alpha$ -tubulin levels). PBS: n=4, AAF:

461 n=4. **(B-G)** *NIK*<sup>flox/flox</sup> and *NIK* <sup>$\Delta$ hep</sup> males were treated with PBS or AAF (10 mg/kg body weight)

462 for 10 days and then subjected to PHx. Livers were harvested 48 h later. **(B)** Representative

463 immunostaining of liver sections with anti-Ki67 antibody. **(C)** Baseline Ki67<sup>+</sup> cell number in

464 resected liver sections obtained from PHx. *NIK*<sup>flox/flox</sup>: n=3, *NIK* <sup>$\Delta$ hep</sup>: n=3. **(D)** Ki67<sup>+</sup> cell number

465 in liver sections (normalized to DAPI<sup>+</sup> cells). PBS;*NIK*<sup>flox/flox</sup>: n=3, AAF;*NIK*<sup>flox/flox</sup>: n=5,

466 AAF;*NIK* <sup>$\Delta$ hep</sup> : n=5. **(E)** Plasma ALT levels. *NIK*<sup>flox/flox</sup>: n=3, *NIK* <sup>$\Delta$ hep</sup> : n=4. **(F)** Liver

467 regeneration rates within 48 h after PHx. *NIK*<sup>flox/flox</sup>: n=5, *NIK* <sup>$\Delta$ hep</sup>: n=5. **(G)** Liver extracts were

468 immunoblotted with the indicated antibodies. Data were statistically analyzed with two-tailed

469 Student's t test, and presented as mean  $\pm$  SEM. \* $p < 0.05$ .

470 **Figure 7. Hepatic *NIK* deficiency corrects impaired hepatocyte reparative proliferation in**

471 **mice with NAFLD. (A-B)** C57BL/6 males (8 weeks) were fed a normal chow diet (n=5) or a

472 HFD (n=5) for 10 weeks. **(A)** Liver TAG levels (normalized to liver weight). **(B)** NF- $\kappa$ B2 p52 in

473 liver extracts was immunoblotted with anti-NF- $\kappa$ B2 antibody (normalized to  $\alpha$ -tubulin levels).

474 **(C-H)** *NIK*<sup>flox/flox</sup> and *NIK* <sup>$\Delta$ hep</sup> males were fed a HFD for 10 weeks followed by PHx, and livers

475 were harvested 48 h after PHx. **(C)** Representative immunostaining of liver sections with anti-

476 Ki67 antibody. **(D)** Baseline Ki67<sup>+</sup> cell number in resected liver sections obtained from PHx.

477 *NIK*<sup>flox/flox</sup>: n=4, *NIK* <sup>$\Delta$ hep</sup> : n=4. **(E)** Liver Ki67<sup>+</sup> cell number (normalized to DAPI<sup>+</sup> cells).

478 Chow;*NIK<sup>flox/flox</sup>*: n=3, HFD;*NIK<sup>flox/flox</sup>*: n=5, HFD;*NIK<sup>Δhep</sup>* : n=5. (F) Liver growth rates within 48  
479 h after PHx. *NIK<sup>flox/flox</sup>*: n=4, *NIK<sup>Δhep</sup>* : n=5. (G) Plasma ALT levels. *NIK<sup>flox/flox</sup>*: n=3, *NIK<sup>Δhep</sup>* :  
480 n=4. (H) Liver extracts were immunoblotted with the indicated antibodies. Data were statistically  
481 analyzed with two-tailed Student's t test, and presented as mean ± SEM. \*p<0.05.

482

483

484

Fig. 1

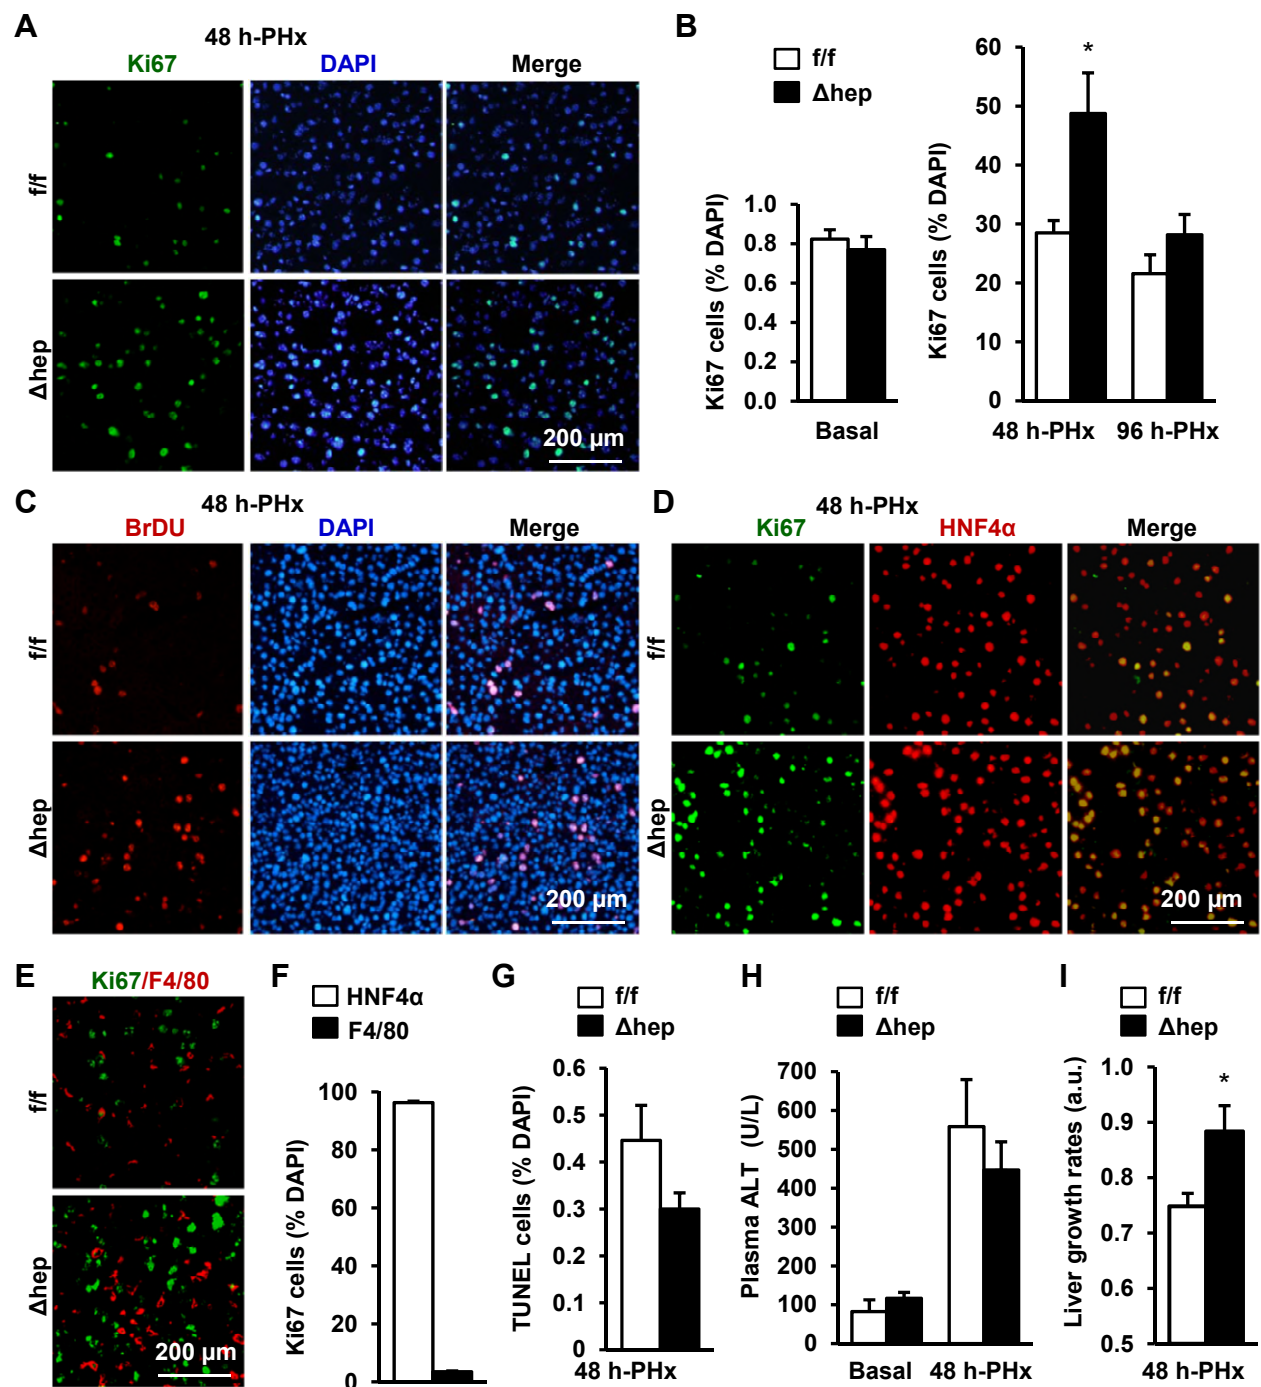



Fig. 2

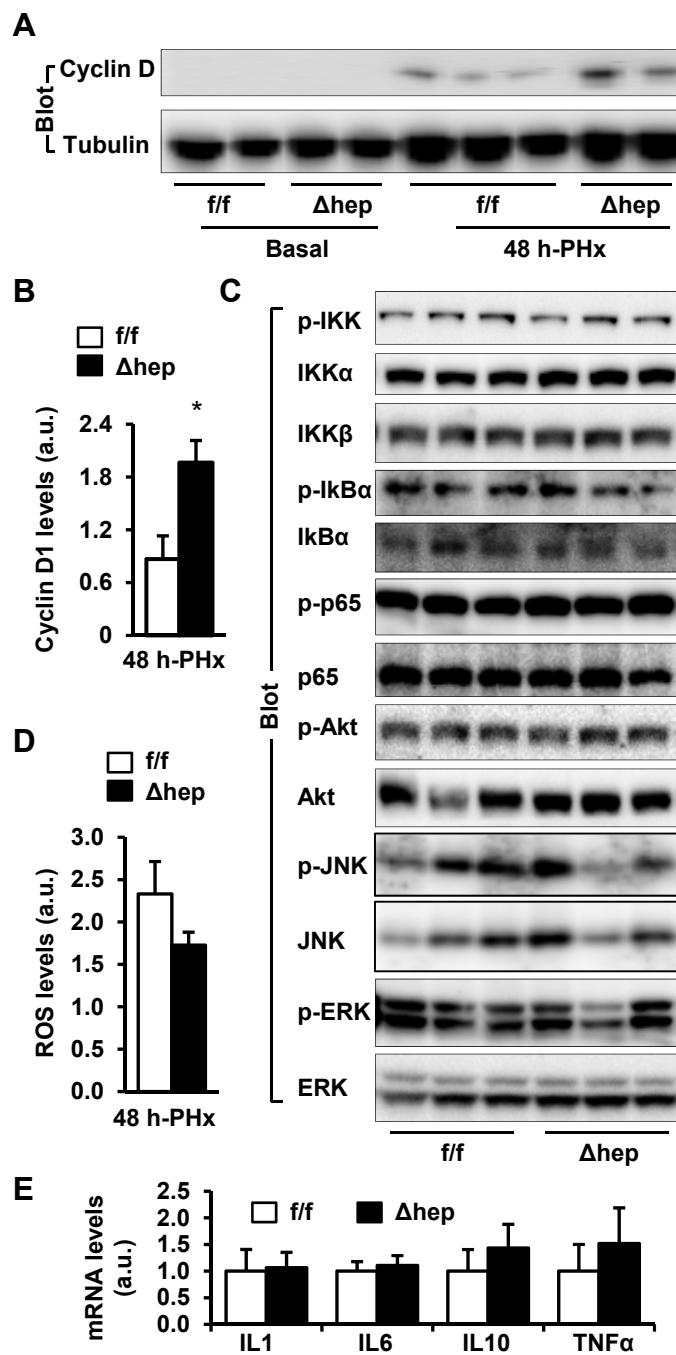

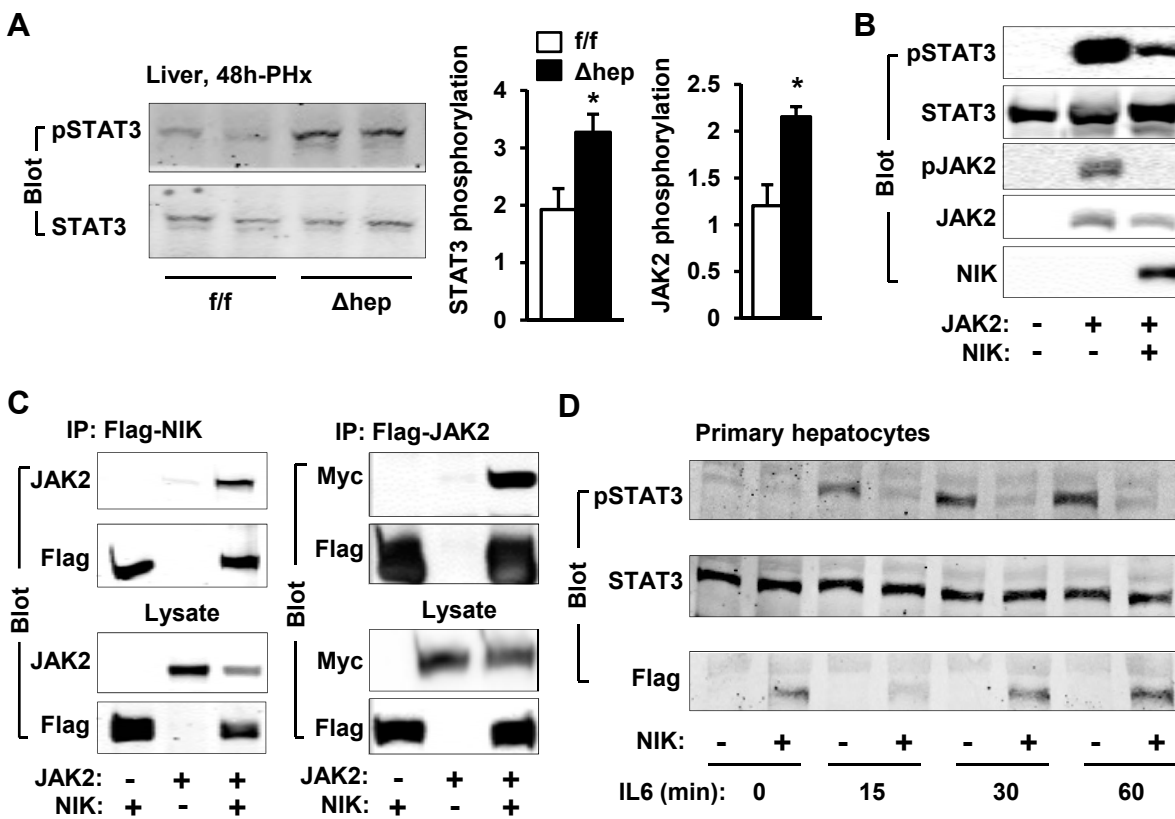

Fig. 4

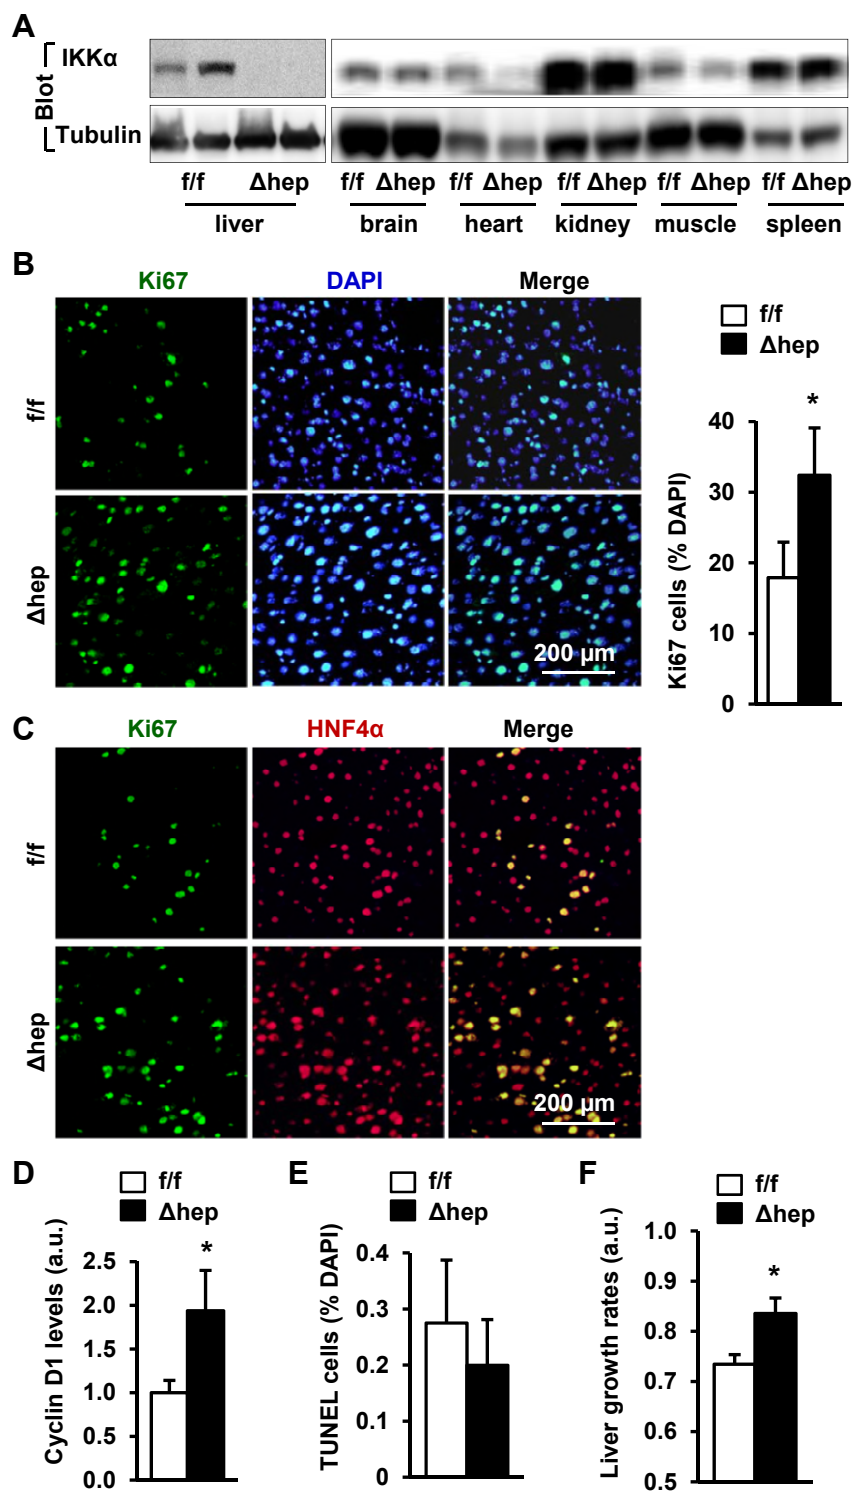

**Fig. 5**

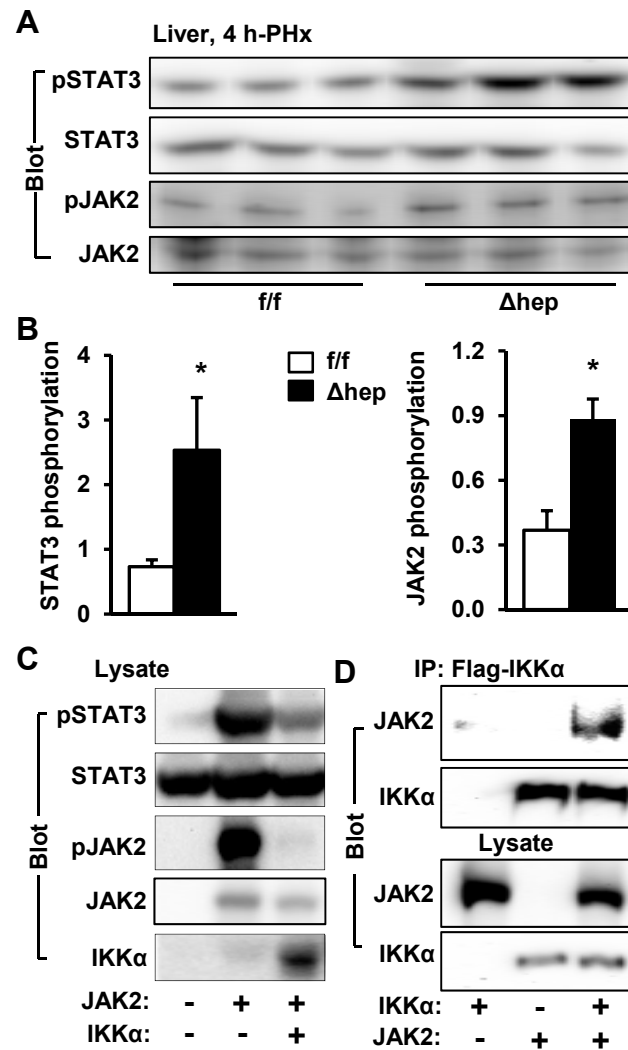

Fig. 6

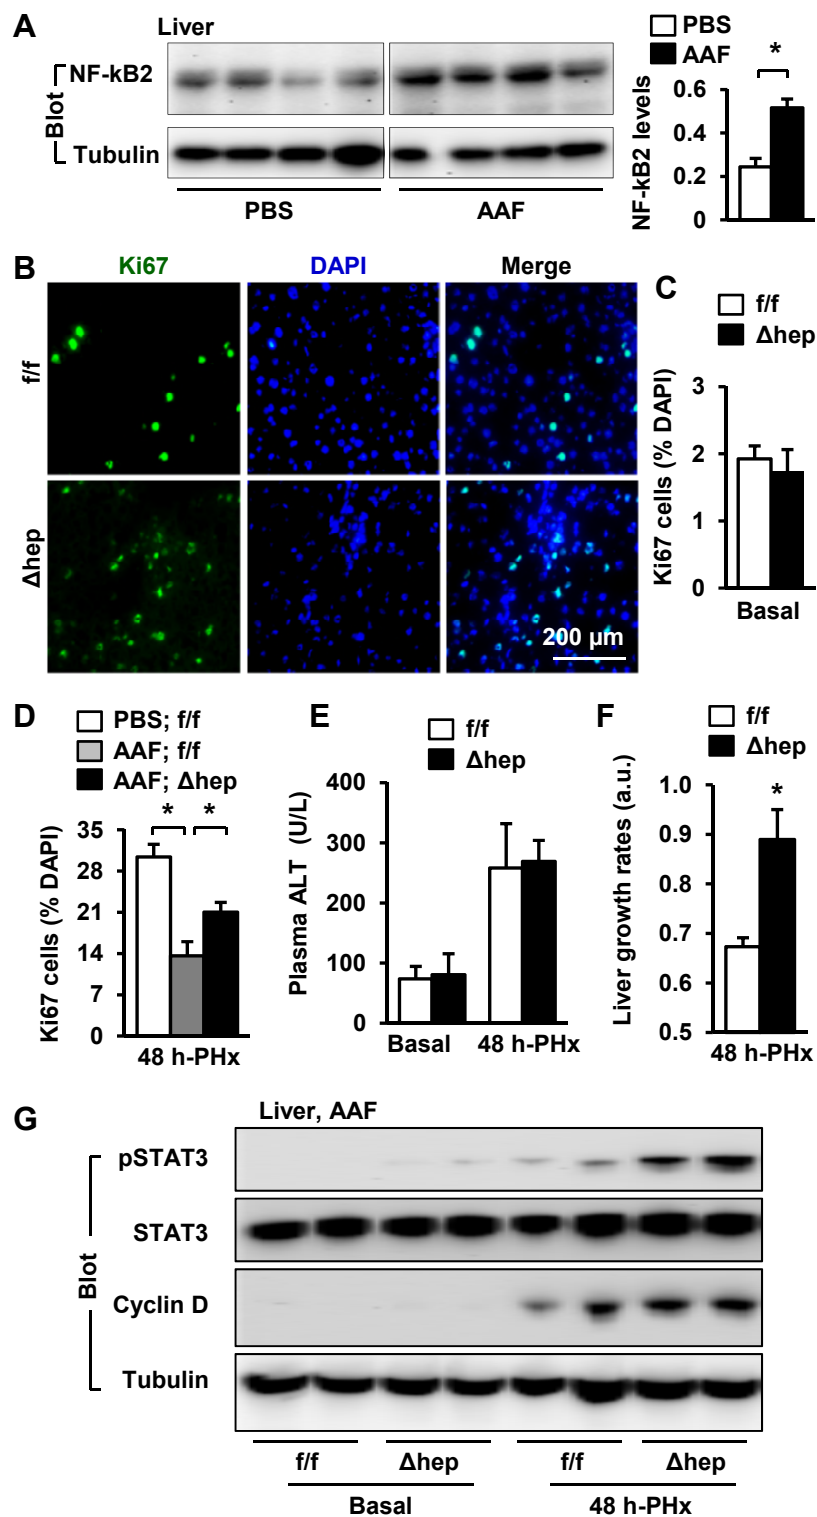

Fig. 7

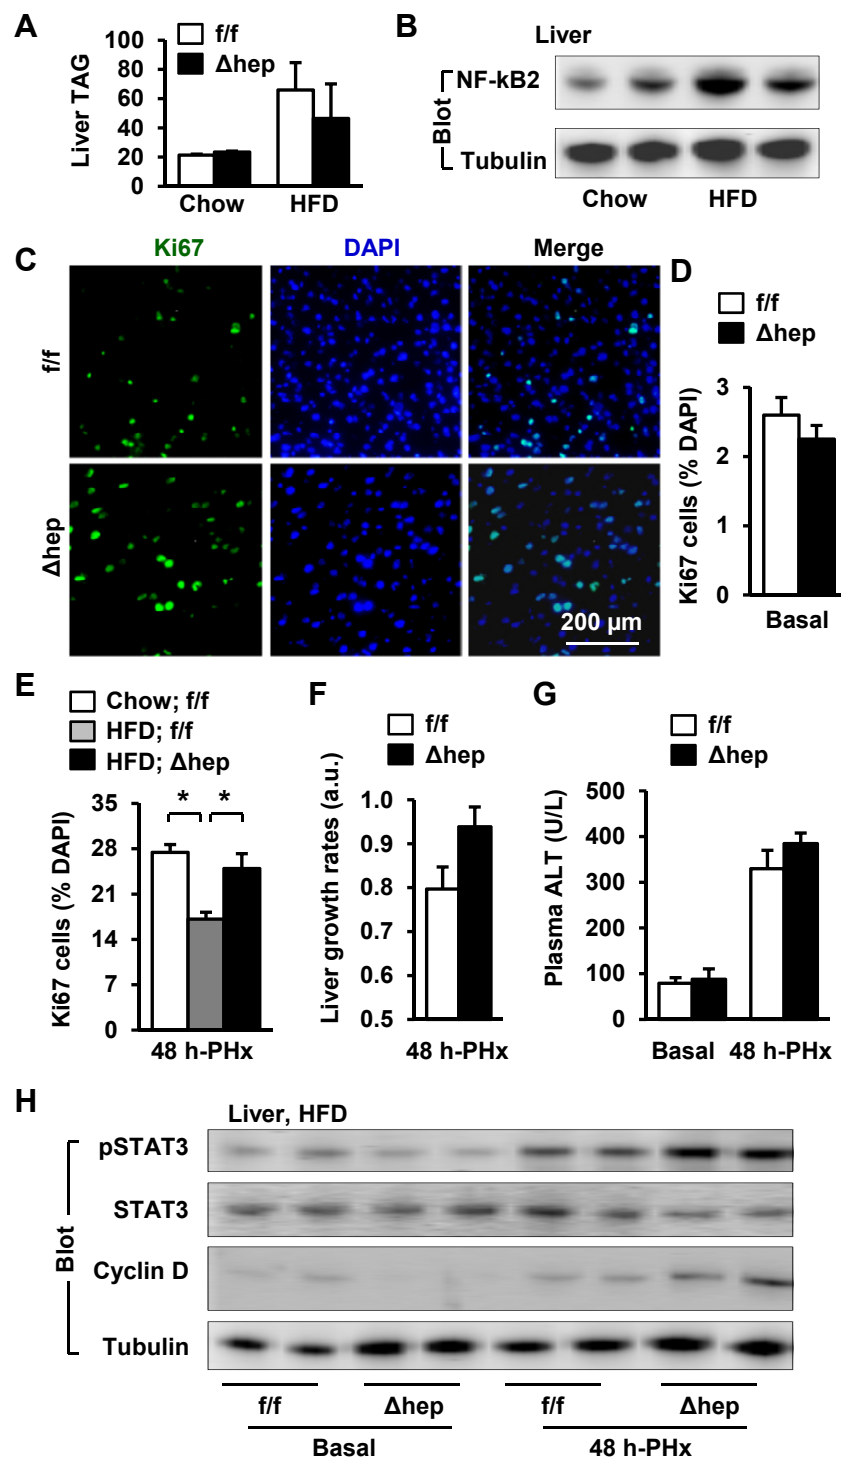

Source: https://www.biorxiv.org/content/10.1101/238717v1.full.pdf
